# Supplementary material for: Distributive rainfall–runoff modelling to understand runoff-to-baseflow proportioning and its impact on the determination of reserve requirements of the Verlorenvlei estuarine lake, west coast, South Africa
Source: Copernicus journal article supplement (doi:10.5194/hess-23-2679-2019), 2019-06-24
Supplement: Supplementary file 1 [file hess-23-2679-2019-supplement.pdf]

Supplement of Hydrol. Earth Syst. Sci., 23, 2679–2697, 2019  
<https://doi.org/10.5194/hess-23-2679-2019-supplement>  
© Author(s) 2019. This work is distributed under  
the Creative Commons Attribution 4.0 License.

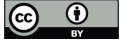

*Supplement of*

**Distributive rainfall–runoff modelling to understand runoff-to-baseflow proportioning and its impact on the determination of reserve requirements of the Verlorenvlei estuarine lake, west coast, South Africa**

**Andrew Watson et al.**

*Correspondence to:* Andrew Watson (awatson@sun.ac.za)

The copyright of individual parts of the supplement might differ from the CC BY 4.0 License.

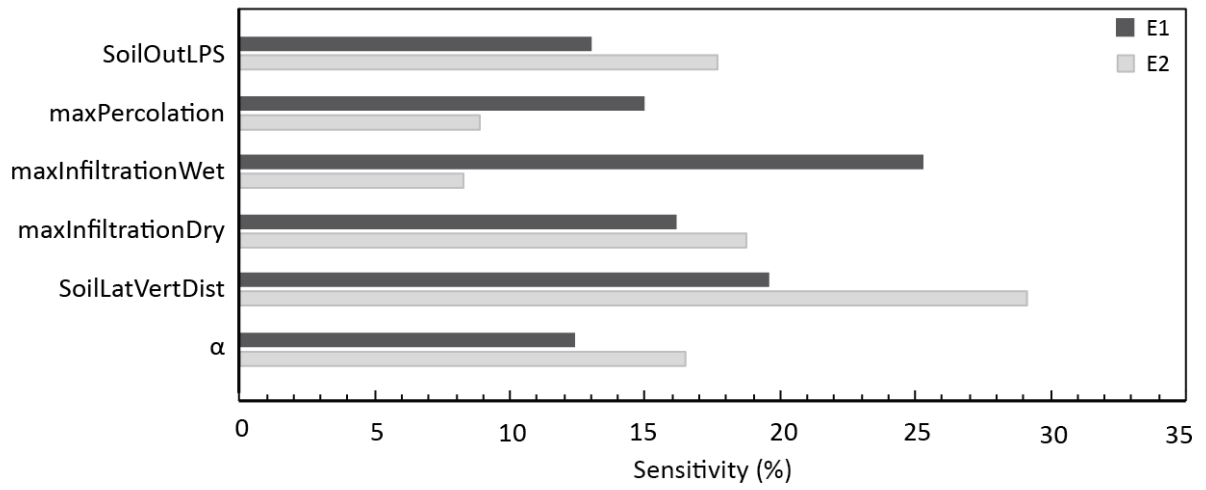

Supplementary Figure 1: The sensitivity analysis conducted for the Verlorenvlei sub-catchment calibration parameters using Nash Sutcliffe Efficiency with squared difference (e2) and absolute values (e1)(Watson *et al.*, 2018)

| Name of parameter       | Description of parameter                                                                                                                                       | min | max | optimized value |
|-------------------------|----------------------------------------------------------------------------------------------------------------------------------------------------------------|-----|-----|-----------------|
| <b>FC_Adaptation</b>    | multiplies the volume of the middle pore storage of soil                                                                                                       | 0.8 | 1.5 | 1.472503        |
| <b>AC_Adaptation</b>    | multiplies the volume of the large pore storage of soil                                                                                                        | 0.8 | 1.5 | 0.804489        |
| <b>gw_CapRise</b>       | parameter to govern the amount of capillary rise to replenish the soil storage out of the groundwater                                                          | 1   | 10  | 4.412625        |
| <b>gwRG1_RG2_dist</b>   | distribution parameter for the slow and fast groundwater runoff (influences overall hydrograph and especially the baseflow)                                    | 0   | 10  | 3.023532        |
| <b>gwRG1Fact</b>        | fast groundwater (slow interflow) delay f (influences overall hydrograph)                                                                                      | 0   | 0.2 | 0.065366        |
| <b>gwRG2Fact</b>        | Base flow delay (influences especially the baseflow)                                                                                                           | 0   | 0.2 | 0.197137        |
| <b>a_rain</b>           | Plant canopy interception parameter (mm/LAI) (Influences basically ET)                                                                                         | 1   | 10  | 6.570599        |
| <b>soilMaxPerc</b>      | Conductivity adaption parameter for leaching water to the groundwater storage. (influences baseflow and overall hydrograph, distribution of runoff components) | 0   | 20  | 5.161027        |
| <b>soilConcRD2</b>      | Interflow delay parameter (influences the quick flow components)                                                                                               | 2   | 5   | 4.94513         |
| <b>soilConcRD1</b>      | Surface runoff delay parameter (influences the quick flow components)                                                                                          | 1   | 2   | 1.33439         |
| <b>soilOutLPS</b>       | Outflow parameter of the large pore storage. (Influencing ET, hydrograph and distribution of runoff components)                                                | 0.1 | 1   | 0.34583         |
| <b>soilMAXDPS</b>       | Parameter describing the maximum storage on the soil surface. (influences ET and surface runoff)                                                               | 3   | 10  | 6.681899        |
| <b>soilMaxInfSummer</b> | Describing the maximum infiltration capacity of soil in the winter period (influences ET and surface runoff)                                                   | 10  | 200 | 118.514         |
| <b>soilMaxInfWinter</b> | Describing the maximum infiltration capacity of soil in the winter period (influences ET and surface runoff)                                                   | 10  | 200 | 29.30617        |
| <b>soilLinRed</b>       | Actual ET parameter, governing the reduction of potential ET according to the soil moisture (influences the ET and therefore the water balance)                | 0   | 1   | 0.333001        |
| <b>flowRouteTA</b>      | Stream routing parameter (overall damping of the hydrograph)                                                                                                   | 1   | 100 | 10.17903        |

Supplementary Table 1: The model calibration parameters for the Verlorenvlei sub-catchment with minimum, maximum and optimized values

| Landuse                                               | Albedo | Root depth (dm) | Sealed grade | Growing season |            |                          |      |            |                          |     |            |                          |       |            |                          |
|-------------------------------------------------------|--------|-----------------|--------------|----------------|------------|--------------------------|------|------------|--------------------------|-----|------------|--------------------------|-------|------------|--------------------------|
|                                                       |        |                 |              | 1              |            |                          | 2    |            |                          | 3   |            |                          | 4     |            |                          |
|                                                       |        |                 |              | LAI            | Height (m) | Surface resistance (s/m) | LAI  | Height (m) | Surface resistance (s/m) | LAI | Height (m) | Surface resistance (s/m) | LAI   | Height (m) | Surface resistance (s/m) |
| <i>Wetlands and waterbodies</i>                       | 150    | 0               | 0            | 1              | 0.05       | 150                      | 1    | 0.05       | 150                      | 1   | 0.05       | 150                      | 0.05  | 1          | 1                        |
| <i>Cultivated (temporary, commercial and dryland)</i> | 0.25   | 5               | 0.3          | 7              | 2          | 50                       | 3.5  | 1.5        | 90                       | 0.2 | 0.2        | 120                      | 3     | 0.4        | 60                       |
| <i>Shrubland and low fynbos</i>                       | 0.2    | 15              | 0            | 5              | 2.5        | 55                       | 4    | 2.5        | 80                       | 1   | 2          | 80                       | 2     | 2          | 50                       |
| <i>Thicket, bushveld, bush clumps, high fynbos</i>    | 0.15   | 20              | 0            | 7              | 3          | 50                       | 10   | 15         | 75                       | 2   | 15         | 75                       | 7     | 3          | 50                       |
| <i>Cultivated (permanent, commercial, irrigation)</i> | 75.125 | 2.5             | 0.15         | 4              | 1.025      | 100                      | 2.25 | 0.775      | 120                      | 0.6 | 0.125      | 135                      | 1.525 | 0.7        | 30.5                     |

Supplementary Table 2: The landuse dataset used for the Verlorenvlei sub-catchment model with the albedo, root depth, sealed grade, LAI, height and surface resistance for each landuse type across 4 different growing seasons

| Soil type       | Horizon | Depth (mm) | Sand, Silt, Clay (%) | Aircap (mm) | FC sum (mm)  | Waterholding |        |
|-----------------|---------|------------|----------------------|-------------|--------------|--------------|--------|
|                 |         |            |                      |             |              | MPS          | LPS    |
| <i>Arenosol</i> | A       | 300        | 89,6,5               | 214.43      | 125.51       | 33.03        | 65.37  |
|                 | B       | 700        | 90,5,5               |             |              | 73.36        | 154.42 |
|                 |         |            |                      |             | <b>Total</b> | 106.39       | 219.79 |
| <i>Leptosol</i> | A       | 100        | 43,29,28             | 5.87        | 28.02        | 28.02        | 5.87   |
|                 |         |            |                      |             | <b>Total</b> | 28.02        | 5.87   |
| <i>Solonetz</i> | A       | 300        | 35,37,28             | 137.45      | 197.63       | 91.47        | 13.62  |
|                 | B       | 700        | 27,37,36             |             |              | 221.27       | 33.95  |
|                 |         |            |                      |             | <b>Total</b> | 312.74       | 47.57  |
| <i>Fluvisol</i> | A       | 300        | 44,33,23             | 192.52      | 142.5        | 85.47        | 16.38  |
|                 | B       | 700        | 45,31,24             |             |              | 183.47       | 40.53  |
|                 |         |            |                      |             | <b>Total</b> | 268.94       | 56.91  |
| <i>Planosol</i> | A       | 300        | 56,25,19             | 138.73      | 187.45       | 77.46        | 22.26  |
|                 | B       | 700        | 44,23,33             |             |              | 191.87       | 42.98  |
|                 |         |            |                      |             | <b>Total</b> | 269.33       | 65.24  |
| <i>Regosol</i>  | A       | 300        | 69,19,12             | 204.57      | 116.67       | 69.63        | 31.59  |
|                 | B       | 700        | 70,17,13             |             |              | 160.93       | 72.87  |
|                 |         |            |                      |             | <b>Total</b> | 230.56       | 104.46 |
| <i>Lixisols</i> | A       | 300        | 63,15,22             | 234.89      | 125.42       | 73.41        | 22.92  |
|                 | B       | 700        | 53,13,34             |             |              | 181.65       | 43.26  |
|                 |         |            |                      |             | <b>Total</b> | 255.06       | 66.18  |
| <i>Cambisol</i> | A       | 300        | 42,26,32             | 214.13      | 120.44       | 83.79        | 17.94  |
|                 | B       | 700        | 41,25,34             |             |              | 196.49       | 41.72  |
|                 |         |            |                      |             | <b>Total</b> | 280.28       | 59.66  |
| <i>Luvisol</i>  | A       | 300        | 51,22,27             | 210.14      | 122.09       | 78.69        | 19.95  |
|                 | B       | 700        | 45,21,34             |             |              | 190.19       | 43.4   |
|                 |         |            |                      |             | <b>Total</b> | 268.88       | 63.35  |

Supplementary Table 3: The soil parameter dataset used for the Verlorenvlei sub-catchment with the depth and texture used to estimate MPS, LPS as well as aircap and field capacity for each soil type horizon
